# Supplementary material for: Screening of Prospective Plant Compounds as H1R and CL1R Inhibitors and Its Antiallergic Efficacy through Molecular Docking Approach
Source: Hindawi journal article supplement (doi:10.1155/2021/6683407), 2021-01-11

**Supplementary File**

Compounds Molecular Names and Molecular Formulas

**Compound ID 10054216:**

Molecular Formula:C24H33N3

Molecular Name:5H-Dibenz(b,f)azepine-5-ethanamine, 10,11-dihydro-N,N-dimethyl-2-(1-piperidinylmethyl)-

MW: 363.5 g/mol

**Compound ID 393471:**

Molecular Formula:(2S)-2-Methyl-4-[(2R,8R,13R)-2,8,13-trihydroxy-13-[(2R,5R)-5-[(1S)-1-hydroxytridecyl] oxolan-2-yl]tridecyl]-2H-furan-5-one

Molecular Formula: C35H64O7

**Compound ID 71448939:**

Molecular Formula:C47H78O19

Molecular Name: Astragaloside V

**Compound ID 10722577:**

Molecular Formula:C37H66O7

Molecular Name: Asiminecin

**Compound ID 442614:**

Molecular Name:(-)-Usnic acid

Molecular Formula:C18H16O7

**Compound ID 10436583:**

Molecular Formula: C29H24O9

Molecular Name: Gericudranins A

MW:516.5 g/mol

**Compound ID 71306915:**

Molecular Formula:C41H66O15

Molecular Name: Astragaloside-II

**Compound ID 11968893:**

Molecular Formula:C45H72O16

Molecular Name: COMPOUND SUMMARY

[(2S,3R,4S,5R)-3-Acetyloxy-5-hydroxy-2-[[14-hydroxy-15-[5-(2-hydroxypropan-2-yl)-2-methyloxolan-2-yl]-7,7,12,16-tetramethyl-9-[(2R,3R,4S,5S,6R)-3,4,5-trihydroxy-6-(hydroxymethyl)oxan-2-yl]oxy-6-pentacyclo[9.7.0.01,3.03,8.012,16]octadecanyl]oxy]oxan-4-yl] acetate

**Compound ID 44566649:**

Molecular Formula:C35H64O10

Molecular Name: Coriaheptocin B

**Compound ID 161538:**

Molecular Formula: C23H32O10

Molecular Name: Paucin

**Compound ID 11843082:**

Molecular Formula:C22H22O10

Molecular Name: 4-(4-Hydroxyphenyl)-7-methoxy-5-[(2S,3R,4S,5S,6R)-3,4,5-trihydroxy-6-(hydroxym ethyl)oxan-2-yl]oxychromen-2-one

MW:446.4 g/mol

**Compound ID 72284:**

Molecular Formula: C41H32O27

Molecular Name: Chebulinic acid

**Compound ID 5282102:**

Molecular Formula: C21H20O11

Molecular Name: Astragalin

**Compound ID 66559251:**

Molecular Formula:C30H48O3

Molecular Name: Karavilagenin E

**Compound ID 102506430:**

Molecular Formula:C30H38O8

Molecular Name: Kosamol A

**Compound ID 10365031:**

Molecular Formula:C25H28O6

Molecular Name: Kenusanone A

**Compound ID 10742453:**

Molecular Formula:C26H32O7

Molecular Name: Kushenol P

**Compound ID 6476337:**

Molecular Formula:C31H40O15

Molecular Name: [(2R,3R,4S,5R,6R)-3,5-Dihydroxy-6-[2-(4-hydroxy-3-methoxyphenyl) ethoxy]-4-[(2S,3R,4R,5R,6S)-3,4,5-trihydroxy-6-methyloxan-2-yl] oxyoxan-2-yl]methyl (E)-3-(3-hydroxy-4-methoxyphenyl)prop-2-enoate

**Compound ID 10746683:**

Molecular Formula:C37H66O8

Molecular Name: Bullatetrocin

**Compound ID 44479224:**

Molecular Formula:C17H14O5

Molecular Name:3-(4-Hydroxybenzyl)-6-methoxy-7-hydroxy-2H-1-benzopyran-2-one

**Sequence Similarity of H1R**


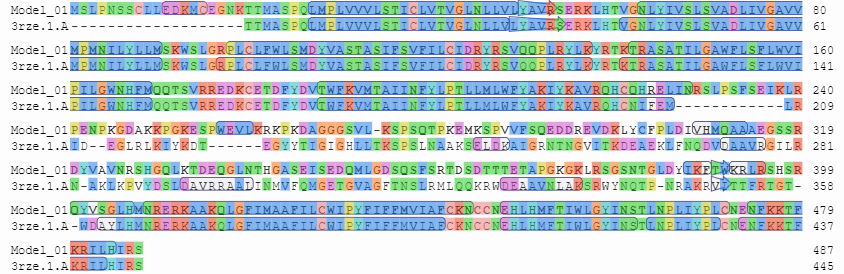

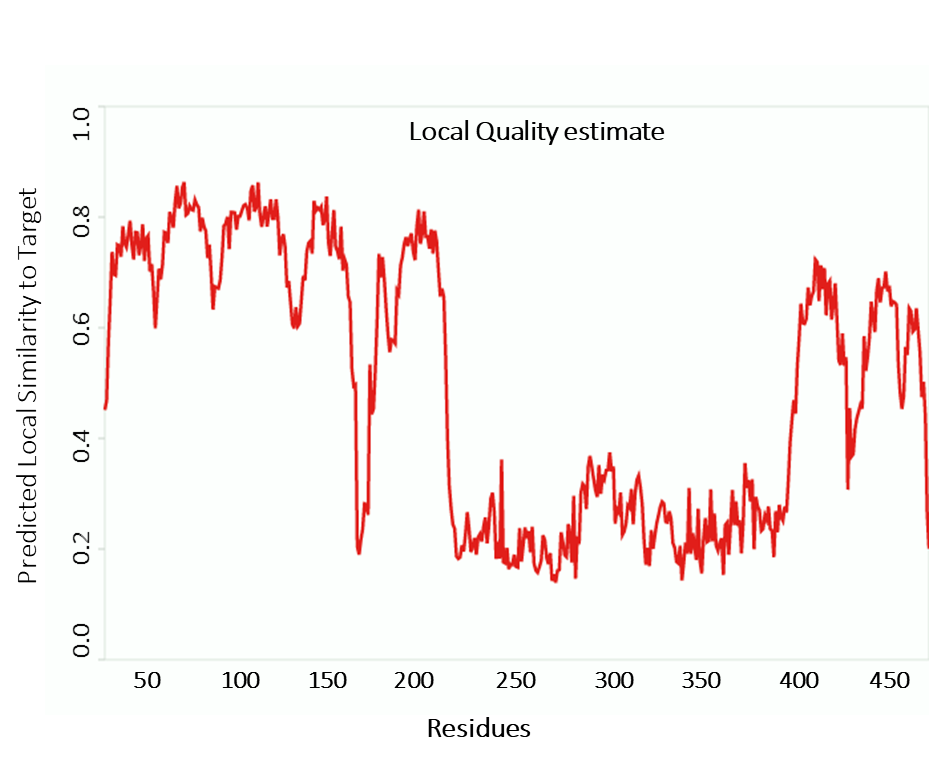

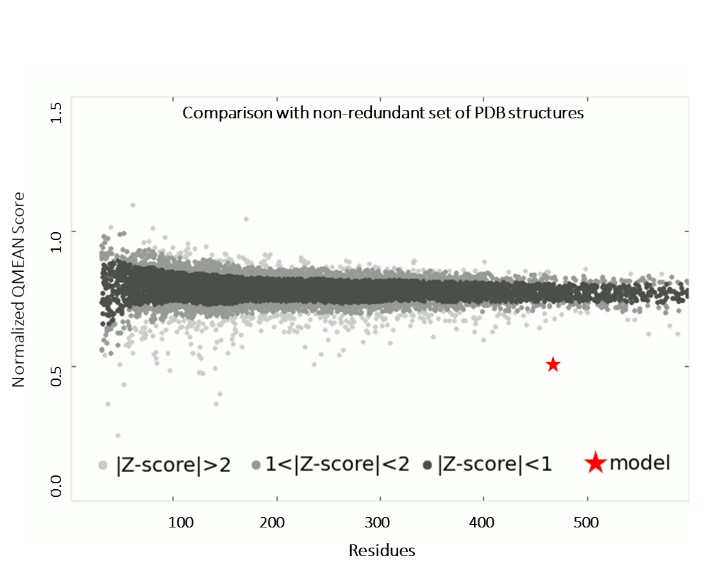


**Sequence similarity of Cl1R**


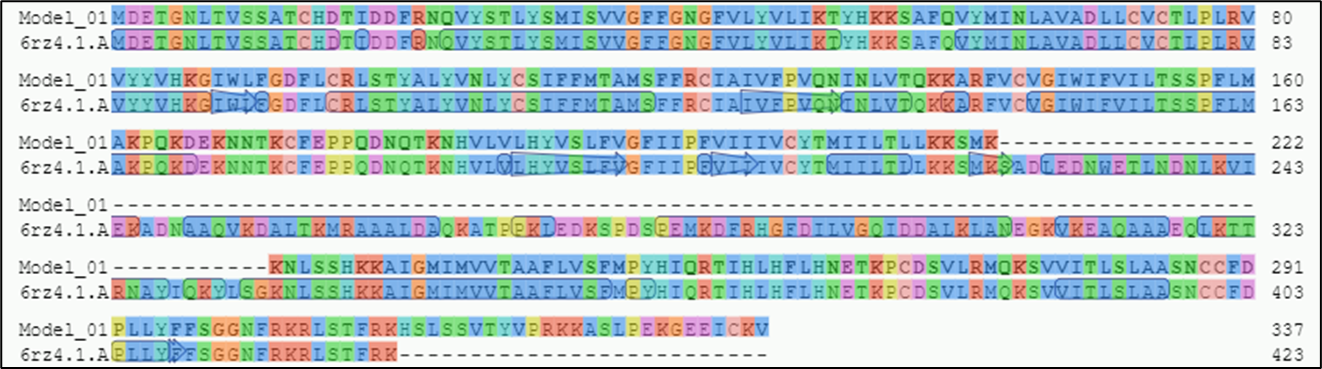


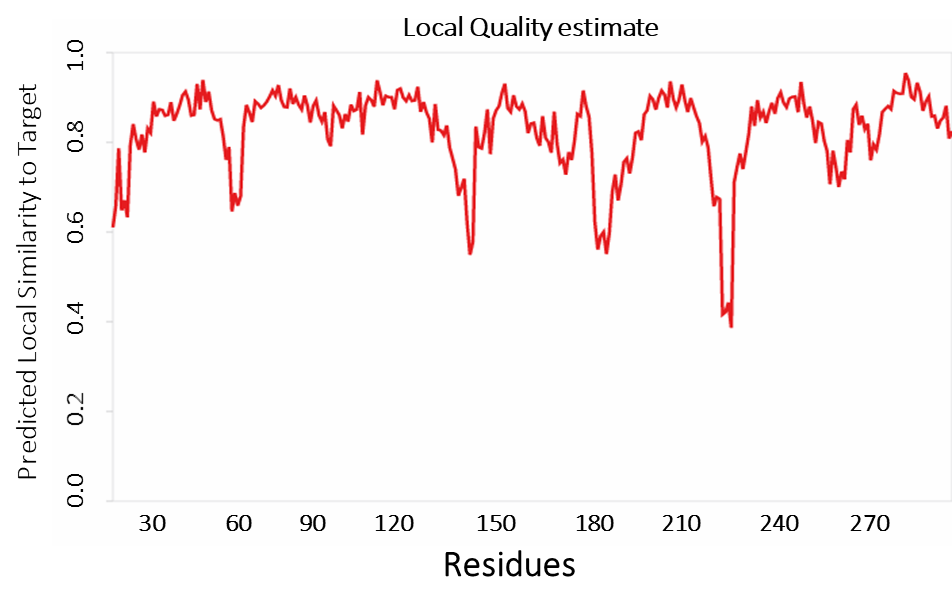

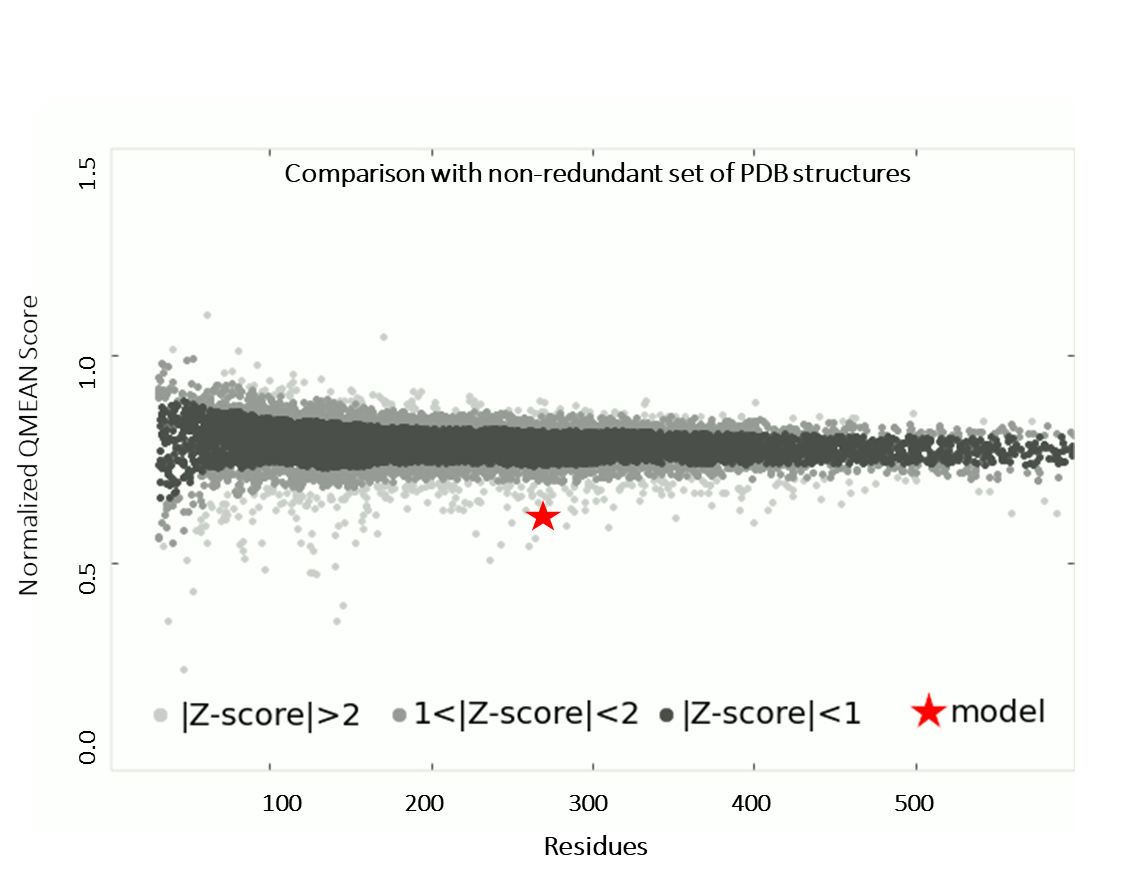

Supplement: f1 [file 6683407.f1.docx]
